# Supplementary material
Source: Elsevier journal article supplement (https://www.sciencedirect.com/science/article/pii/S0213911112003305)
Supplement: mmc1 [file S0213911112003305:mmc1.doc]

**Appendix**

**Table I**

Violence – related questions used in the questionnaire

| **Could you please tell me if in the past 12 months, your partner (or ex - partner) has had some of these behaviours or actions with you and how often?** |
| --- |
| ***Psychological*** (answers: never, rarely, sometimes, frequently, always/regularly) |
| Prevented you from talking or seeing your friends or relatives |
| Prevented you from talking with other men (he is jealous) |
| Criticizes or devalues what you do |
| Made nasty comments about your physical appearance |
| Imposed you a way of dressing, combing or behaving in public |
| Despised or scorned your opinions |
| Tells you what you should think |
| Insists on knowing with whom and where you are all the time |
| Refuses completely to talk or discuss an issue with you |
| Prevented you from accessing the money for everyday needs |
| Threatened to take away your children |
| Threatened to commit suicide |
| Threatened to hurt you or someone of your family |
| Insulted or offended you |
| Threw you out of home or prevented you from entering |
| ***Sexual violence***  (Answers: never, once, 2-3 times, 4-10 times, more than 10 times, nearly every day/always) |
| Physically forced you to have sexual intercourse when you did not want to |
| Forced you to participate in sexual acts you rejected |
| ***Physical violence*** (Answers: never, once, 2 times, 3-5 times, 6-10 times, 10-20 times, more than 20 times) |
| Threw something at you |
| Pushed, grabbed or shoved you |
| Slapped you |
| Kick, hit or punched you |
| Hit or tried to hit you with something |
| Beat you up |
| Choked you |
| Threatened you with a knife or a gun |
| Used a knife or a gun on you |
| ***Self-perception of abuse***  “¿Do you feel abused by your partner/expartner?” |
